# Supplementary material for: Aggregation-induced emission dye based luminescent silica nanoparticles: facile preparation, biocompatibility evaluation and cell imaging applications
Source: Royal Society of Chemistry journal article supplement (doi:10.1039/c3ra46076b), 2013-12-11
Supplement: c3ra46076b.pdf [file c3ra46076b.pdf]

# Aggregation-induced Emission Dyes Based Luminescent Silica Nanoparticles: Facile Preparation, Biocompatibility Evaluation and Cell Imaging Applications

Xiaoyong Zhang<sup>a, b, #, \*</sup>, Xiqi Zhang<sup>b, #</sup>, Bin Yang<sup>b</sup>, Liangji Liu<sup>c</sup>, Junfeng Hui<sup>b</sup>,  
Meiying Liu<sup>d</sup>, Yiwang Chen<sup>a</sup>, Yen Wei<sup>b, \*</sup>

a Department of Chemistry/Institute of Polymers, Nanchang University, 999 Xuefu Avenue, Nanchang 330031, China. b Department of Chemistry and Key Laboratory of Bioorganic Phosphorus Chemistry & Chemical Biology (Ministry of Education), Tsinghua University, Beijing, 100084, P. R. China. c Affiliated Hospital of Jiangxi University of Traditional Chinese Medicine, d Beijing National Laboratory for Molecular Sciences (BNLMS), Key Laboratory of Organic Solids, Laboratory of New Materials, Institute of Chemistry, Chinese Academy of Sciences, Beijing 100190, China.

# These authors contributed equally to this work.

## Results

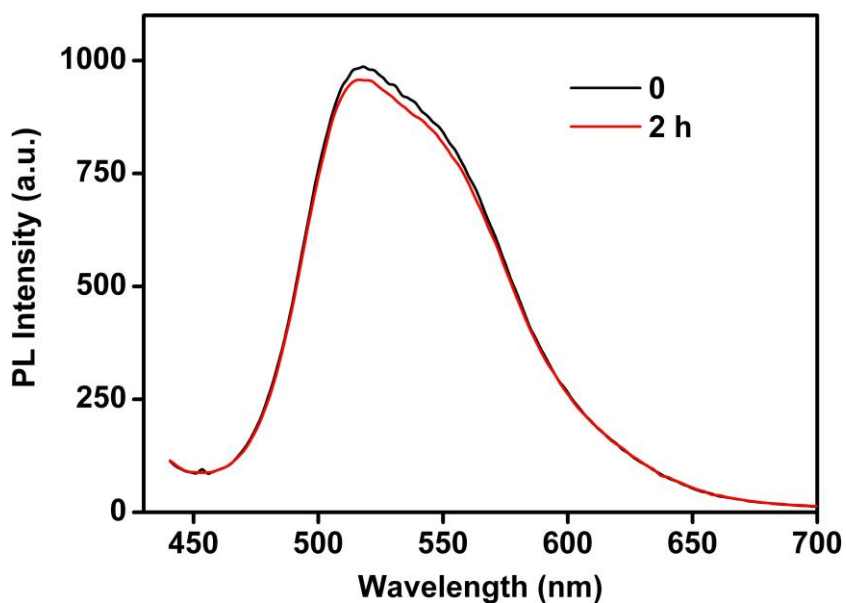

Fig. S1 Photostability of An18-SiO<sub>2</sub> NPs water dispersion after they were irradiated by UV lamp ( $\lambda = 365$  nm).

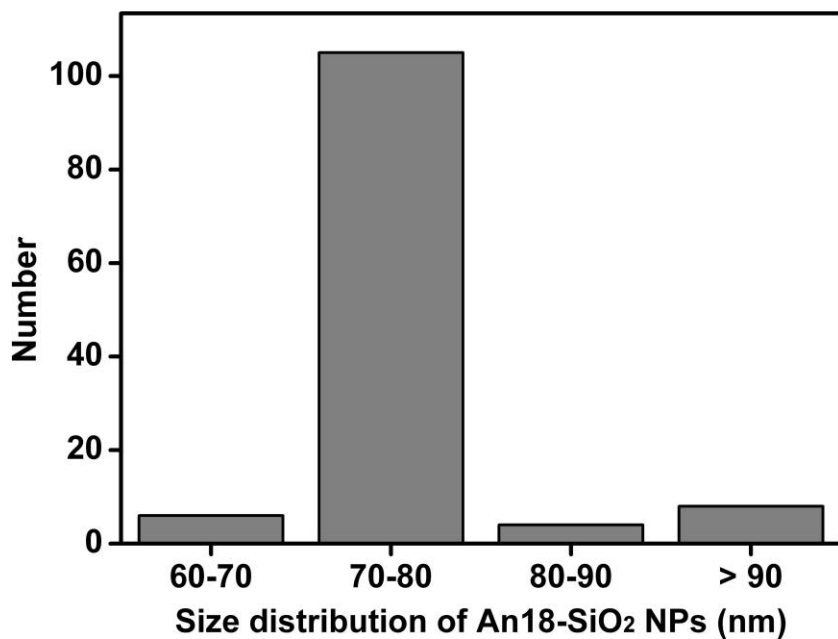

Fig. S2 Size distribution of An18-SiO<sub>2</sub> NPs based on TEM images.
